# Supplementary material for: A Rare Mutation in ABCC8/SUR1 Leading to Altered ATP-Sensitive K+ Channel Activity and β-Cell Glucose Sensing Is Associated With Type 2 Diabetes in Adults
Source: Oxford University Press journal article supplement (doi:10.2337/db07-1547), 2008-03-18
Supplement: db07-1547figurelegends.doc [file db07-1547figurelegends.doc]

### Supplementary information

Pedigrees of the families with T2DM-associated mutations

Supplementary Fig.1 shows the partial pedigrees of families carrying Y356C, R248Q and K1521N mutations in the *ABCC8* gene. Y356C and K1521N mutations were inherited in the families whilst R248Q was not. The son-in-law and the granddaughter of the R248Q carrier were, however, diagnosed with T2DM, which was not linked to the *ABCC8* genotype. All the seven carriers of the three mutations were heterozygous.

Clinical characteristics of T2D patients with Y356C mutation in SUR1

A 70 year old man, without any personal and familial history of diabetes, was diagnosed with T2D at 45 years old, with initial blood glucose of 123 mg/dl observed five years before. Initial body weight was 76 kg for 1.71 m of height (body mass index, BMI = 26kg/m2).

The patient participated in a large-scale genetic study for gene screening in T2D patients. He was found to carry a heterozygote mutation in the *ABCC8* gene, A1067G, that causes a substitution of tyrosine by cysteine at residue 356 of SUR1 subunit of the KATP channel.

Two children of the patient who both carry the same heterozygote mutation (Y356C) were explored for their metabolic status:

1. Patient’s daughter, 35, non-diabetic, without any personal history of diabetes, had weight of 58 kg and height of 1.73 m, with a normal BMI of 19.37 kg/m². The fasting blood glucose was normal (4.9 mmol/l) with blood insulin = 1.33U/ml. Two hours after 75g-OGTT, the blood glucose showed a carbohydrate intolerance: it was 9.4 mmol/l with an insulin of 27.54U/ml. The insulinogenic index, determined according to the formula:

(1)

where I30’, I0’, G30’, G0’ correspond to insulin and glucose concentrations in blood at the start of the test (0’) and 30 min after (30’) was low (2.58 UI/ml/mmol×l vs 16.9±10.7 UI/ml/mmol×l in control subjects). This result suggests an impairment of insulin secretion.

The insulin sensitivity was high: the M-value measured using the euglycemic clamp was 12.32 mg/kg fat free mass/min (control: 10.88+/-2.36 mg/kg). The disposition index (M‑value×insulinogenic index) was lower than in controls : 31.78 vs 184.21+/-25.16. Insulin secretion in response to intravenous injection of glucose (±arginine) was at the lower normal range. Glucagon inhibition in response to intravenous injection of glucose and glucagon secretion in response to arginine were normal as well.

2. Patient’s son, 33, non-diabetic, without any personal history of diabetes, had weight of 72 kg, height of 1.80 m and a normal BMI at 22.22 kg/m². Fasting blood glucose was 5.0 mmol/l with an insulin of 4.11U/ml. Two hours after 75g-OGTT the blood glucose was 6.2 mmol/l with an insulin at 28.45U/ml. The insulinogenic index was low, similar to the sibling (7.95 UI/ml/mmol×l vs 16.9 +/- 10.7UI/ml/mmol×l in controls), thus insulin secretion was impaired as well.

The M-value of the insulin sensitivity was low (6.71 mg/kg fat free mass/min vs 10.88 +/- 2.36 in controls). The disposition index was low (53.34 vs 184.21+/-25.16 in controls). Insulin secretion in response to intravenous injection of glucose (±arginine) was at the lower normal range. Glucagon secretion in response to arginine was low.

Thus, insulin secretion was mildly impaired in both of the two children of the Patient. From our analyses, a good insulin sensitivity is seen in the daughter, but an insulin resistance is observed in the son. Insulinogenic index is low in both siblings, in response to oral glucose. The son has also impaired secretion of glucagon. The working hypothesis is that the ABCC8/SUR1 mutation could be involved in these metabolic defects.

Site-directed mutagenesis

Primers used for the site-directed mutagenesis used in this work are listed in Supplementary Table 1.

Immunocytochemistry

Two copies of the *c-myc*-epitope were inserted into the first extracellular loop of SUR1 after NBD1, using a unique Bpu1102 site (1) The phosphorylated primers used were identical to the ones used in (1): forward, 5'-P TCA GCG GTG AGC AGA AAC TAA TTT CTG AGG AGG ACT TAG GGC; reverse, 5'-P TGA GCC CTA AGT CCT CCT CAG AAA TTA GTT TCT GCT CAC CGC.

Homology modelling of SUR1 structure

Our observation that the effect of the Y356C substitution on KATP channel activity was Mg2+ independent, is perhaps best explained as a result of an allosteric effect acting through the Kir6.2 subunit. To explore the likely position of this residue, Modeller version 8.2 (2) was used to create a homology model of SUR1 (excluding the TMD0 region) using the *Staphylococcus aureus* multidrug ABC transporter Sav1866 (2HYD.pdb) as a structural template (3). Because the percentage identities of the TMD1 and TMD2 regions of SUR1 with that of Sav1866 were only 17% and 15% respectively, the Multiple Mapping Method (4) was used to guide the initial alignment of the two proteins. This alignment was then adjusted in the light of analyses of the aligned sequences of multiple SUR1 homologues and, separately, of Sav1866 homologues for patterns of residue conservation (5) and of hydrophobicity. 100 models were made using the final alignment and the five of lowest energy assessed for quality using PROCHECK (6). The chosen model had no residues in the disallowed region of the Ramachandran plot and the predicted topology and residue accessibilities to the solvent were consistent with previously-reported experimental data on SUR1 (7). As shown in Supplementary Fig.1, Y356 is located at the extracellular surface of the plasma membrane, while residues L582 and H1023 are located at helices within the TMD cluster and therefore are unlikely to interact with either Kir6.2 or TMD0 of SUR1. This is consistent with an intrasubunit effect of the L582V and H1023Y mutations to affect ATP binding to the ATP binding cassette in NBD1 of SUR1 (Supplementary Fig.2 and Fig.1B). As such, the effect of the L582V mutation may be analogous to that of the previously reported for the H1023 mutation (8), shown here to decrease ATP sensitivity by almost two orders of magnitude (Fig. 1C, Supplementary Table 2).

MgATP sensitivity of KATP channels expressed in β-cell line transfected with SUR1-Y356C

Transfection of a β-cell line with a single KATP channel subunit can, from a theoretical point-of-view, result in overexpression of the exogenous subunit on the plasma membrane of the cell. This assumption emanates from the facts that: (a) the subunits of KATP channel traffic to the plasma membrane in pre-assembled state (9) and (b) the internalisation of KATP channels happens on the timescale of 1 hour (10). Thus, given overall higher translational efficiency of the exogenous channels, we would expect them to be overexpressed on the β-cell membrane, even several hours after transfection.

To assess the extent of overexpression of the exogenous KATP channels in a β-cell line, we transfected MIN6 cells with SUR1-Y356C (following the protocol described in Research Design and Methods) and measured the sensitivity of KATP channels to MgATP, in inside-out patches (Supplementary Fig.4). We observed a clear reduction in MgATP-sensitivity (IC50=84±13M, Y356C, vs IC50=21±2M, wild-type, P<0.05). The sensitivity of Y356C mutant was not significantly different from that measured after expression in HEK293 cells (IC50=95±9M) that lack endogenous KATP channels. This data indicates that it is exogenous SUR1 that dominates in the plasma membrane channels.

### Supplementary Figure legends

Supplementary Figure 1

**Pedigrees of the three families with ABCC8 mutations (Y356C, R248Q and K1521N).** Squares represent male family members, circles female family members, symbol with a slash indicates deceased family member. Black symbols denote diabetic patients who were identified as carriers of ABCC8 mutations, hatched symbols diabetic patients who did not carry the ABCC8 mutation, grey symbols individuals identified with an ABCC8 mutation but not presenting with hyperglycemia or overt diabetes, white symbols individuals without known diabetes and testing negative for ABCC8 mutation. ABCC8 alleles are indicated as NN (two normal alleles), NM (one normal and one mutated allele) or ND (not determined). Age at the diagnosis, for the diabetic patients, or age at last examination, for the non diabetic individuals, is indicated below the genotype.

Supplementary Figure 2

**Conservation of the mutated residues in SUR1 between different species**. **A:** residues associated with T2D, **B:** residues associated with TND.

Supplementary Figure 3

**Putative location of the mutated residues.** Graphic representation of SUR1 modelled using Sav1866 coordinates viewed from side (**A**) and top (**B**). For clarity TMD1 and TMD2 are given in different colours. Residues Y356, L582, H1023, R1379, K1521 are given in cpk.

Supplementary Figure 4

**MgATP sensitivity of KATP channels in MIN6 cells overexpressing SUR1-wild-type or SUR1-Y356C.** MgATP concentration-inhibition curves for KATP channels, measured in inside-out patches excised from the membrane of MIN6 β-cells transfected with SUR1-wild-type (open circles, n=5) or Y356C-SUR1 (filled circles, n=5).

Supplementary Table 1

Primers for the site-directed mutagenesis used in the work

| Y356C | Forward | CTTGGCAATGCCTGCGTCTTGGCCGTG |
| --- | --- | --- |
| Reverse | CACGGCCAAGACGCAGGCATTGCCAAG |
| K1521 | Forward | CGGAGAACATCCTCCAGAACGTGGTGATGACAGCC |
| Reverse | GGCTGTCATCACCACGTTCTGGAGGATGTTCTCCG |
| H1023Y | Forward | CTCCCAGCTGCTCAAGTACATGGTCTTGGTGGCC |
| Reverse | GGCCACCAAGACCATGTACTTGAGCAGCTGGGAG |
| L582V | Forward | GCCTCCCTCTCTGTCTTCCACATCCTGG |
| Reverse | CCAGGATGTGGAAGACAGAGAGGGAGGC |
| R1379C | Forward | GGGATCTGCGGCTGCACAGGCAGCGGG |
| Reverse | CCCGCTGCCTGTGCAGCCGCAGATCCC |

Supplementary Table 2

**Parameters of ATP inhibition (IC50, mol/l) for KATP channels with mutations in the SUR1 subunit.** Intracellular solution had ~1 mM free Mg2+. Number of experiments is given in parentheses.

| WT | R248Q | Y356C | K1521N | L582V | H1023Y | R1379C |
| --- | --- | --- | --- | --- | --- | --- |
| 24±3 (6) | 26±7 (6) | 95±9 (10) | 18±5 (6) | 1140±436 (6) | 427±63 (4) | 858±94 (4) |

#### References

1. Sharma N, Crane A, Clement JPt, Gonzalez G, Babenko AP, Bryan J, Aguilar-Bryan L: The C terminus of SUR1 is required for trafficking of KATP channels. *J Biol Chem* 274:20628-20632, 1999

2. Fiser A, Sali A: Modeller: generation and refinement of homology-based protein structure models. *Methods Enzymol* 374:461-491, 2003

3. Dawson RJ, Locher KP: Structure of a bacterial multidrug ABC transporter. *Nature* 443:180-185, 2006

4. Rai BK, Madrid-Aliste CJ, Fajardo JE, Fiser A: MMM: a sequence-to-structure alignment protocol. *Bioinformatics* 22:2691-2692, 2006

5. Berezin C, Glaser F, Rosenberg J, Paz I, Pupko T, Fariselli P, Casadio R, Ben-Tal N: ConSeq: the identification of functionally and structurally important residues in protein sequences. *Bioinformatics* 20:1322-1324, 2004

6. Laskowski R, MacArthur M, Moss D, Thornton J: PROCHECK: a program to check the stereochemical quality of protein structures. *J Appl Cryst* 26:26:283-291, 1993

7. Conti LR, Radeke CM, Shyng SL, Vandenberg CA: Transmembrane topology of the sulfonylurea receptor SUR1. *J Biol Chem* 276:41270-41278, 2001

8. Babenko AP, Polak M, Cave H, Busiah K, Czernichow P, Scharfmann R, Bryan J, Aguilar-Bryan L, Vaxillaire M, Froguel P: Activating mutations in the ABCC8 gene in neonatal diabetes mellitus. *N Engl J Med* 355:456-466, 2006

9. Schwappach B, Zerangue N, Jan YN, Jan LY: Molecular basis for K(ATP) assembly: transmembrane interactions mediate association of a K+ channel with an ABC transporter. *Neuron* 26:155-167, 2000

10. Mankouri J, Taneja TK, Smith AJ, Ponnambalam S, Sivaprasadarao A: Kir6.2 mutations causing neonatal diabetes prevent endocytosis of ATP-sensitive potassium channels. *Embo J* 25:4142-4151, 2006
